# Supplementary material for: Therapeutic Potential of Natural Compounds in Neurodegenerative Diseases: Insights from Clinical Trials
Source: MDPI journal article supplement (doi:10.3390/pharmaceutics15010212), 2023-01-07
Supplement: s1 [file s1]

# Supplementary Materials: Therapeutic Potential of Natural Compounds in Neurodegenerative Diseases: Insights from Clinical Trials

Stéphanie Andrade, Débora Nunes, Meghna Dabur, Maria J. Ramalho, Maria C. Pereira and Joana A. Loureiro

## List of natural compounds included in the literature search:.

1,2,3,4,6-Penta-O-galloyl- $\beta$ -d-glucopyranose  
13-Desmethyl spiroside C  
 $\beta$ -carotene  
Apigenin  
Asiatic acid  
Baicalein  
Berberine  
Bryostatin  
Docosahexaenoic acid  
Caffeic acid  
Caffeine  
Crocin  
Curcumin  
Ellagic acid  
Enoxaparin  
Epicatechin  
Epigallocatechin gallate  
Ferulic acid  
Fisetin  
Gallic acid  
Glycine betaine  
Gossypin  
Gypenoside  
Homotaurine  
Honokiol  
Huperzine A  
Hydroxytyrosol  
Kaempferol  
Lipoic acid  
l-theanine  
Luteolin  
Melatonin  
Morin  
Myricetin  
Naringenin  
Naringin  
Nicotine  
Nordihydroguaiaretic acid  
Oleocanthal  
Oleuropein  
Osthole  
Piperine  
Puerarin

Punicalagin  
Quercetin  
Resveratrol  
Retinoic acid  
Rhodosin  
Rosmarinic acid  
Rutin  
Salvianolic acid B Tannic acid  
Scyllo-inositol  
Vanillic acid  
Viniferin  
Vitamin A  
Vitamin B  
Vitamin C  
Vitamin D  
Vitamin E  
Vitamin K
